# Supplementary material
Source: PubMed Central journal article supplement (PMC3059433)
Supplement: mmc1.pdf [file mmc1.pdf]

|         |    |          |       |            |           |                   |       |   |       |          |          |          |   |   |   |
|---------|----|----------|-------|------------|-----------|-------------------|-------|---|-------|----------|----------|----------|---|---|---|
|         |    |          |       | rs12041056 | 67399848  | -                 | 0.001 | N | -     | 1.21E-04 |          |          |   |   |   |
|         |    |          |       | rs12030948 | 67474353  | intron            | 0.047 | N | -     | 1.31E-04 |          |          |   |   |   |
|         |    |          |       | rs10127763 | 67424321  | intron            | 0.001 | N | 0.64  | 1.38E-02 |          |          |   |   |   |
|         |    |          |       | rs4655689  | 67432009  | intron            | 0.01  | N | 0.597 | 1.44E-02 |          |          |   |   |   |
|         |    |          |       | rs6687620  | 67421048  | intron            | 0     | N | -     | 1.54E-02 |          |          |   |   |   |
| NOD2    | 16 | 49283551 | 45937 | rs2076756  | 49314382  | intron            | 0.098 | N | -     | 5.34E-28 | 8.54E-27 | 3.25E-27 | Y | Y | Y |
|         |    |          |       | rs5743289  | 49314275  | intron            | 0.252 | N | 1.804 | 4.08E-24 |          |          |   |   |   |
|         |    |          |       | rs2066843  | 49302700  | coding-synonymous | 0.191 | N | -     | 4.49E-24 |          |          |   |   |   |
|         |    |          |       | rs17221417 | 49297083  | intron            | 0     | N | -     | 1.19E-22 |          |          |   |   |   |
|         |    |          |       | rs3135499  | 49323628  | utr-3             | 0     | N | 1.23  | 3.47E-11 |          |          |   |   |   |
|         |    |          |       | rs10521209 | 49313210  | intron            | 0     | N | -     | 1.93E-10 |          |          |   |   |   |
|         |    |          |       | rs17312836 | 49298963  | intron            | 0     | N | -     | 3.02E-10 |          |          |   |   |   |
|         |    |          |       | rs11647841 | 49300832  | intron            | 0     | N | -     | 3.52E-10 |          |          |   |   |   |
|         |    |          |       | rs748855   | 49308899  | intron            | 0     | N | -     | 3.53E-10 |          |          |   |   |   |
|         |    |          |       | rs1861758  | 49309288  | intron            | 0     | N | -     | 5.49E-10 |          |          |   |   |   |
|         |    |          |       | rs1861759  | 49303084  | coding-synonymous | 0     | N | -     | 5.69E-10 |          |          |   |   |   |
|         |    |          |       | rs5743291  | 49314777  | missense          | 0.079 | N | -     | 1.24E-05 |          |          |   |   |   |
|         |    |          |       | rs1077861  | 49317048  | intron            | 0     | N | 0.6   | 1.08E-04 |          |          |   |   |   |
|         |    |          |       | rs751271   | 49308676  | intron            | 0     | N | -     | 2.02E-04 |          |          |   |   |   |
|         |    |          |       | rs8057341  | 49295481  | intron            | 0     | N | 0.146 | 1.59E-03 |          |          |   |   |   |
| ATG16L1 | 2  | 23381995 | 54103 | rs2241880  | 233848107 | missense          | 0.593 | N | -     | 1.32E-18 | 1.43E-17 | 8.77E-18 | Y | Y | Y |
|         |    | 6        |       | rs6431654  | 233826508 | intron            | 0.009 | N | -     | 2.58E-18 |          |          |   |   |   |
|         |    |          |       | rs6752107  | 233826187 | intron            | 0     | N | -     | 3.64E-18 |          |          |   |   |   |
|         |    |          |       | rs10210302 | 233823578 | near-gene-5       | 0     | N | 1.827 | 3.90E-18 |          |          |   |   |   |
|         |    |          |       | rs3828309  | 233845149 | intron            | 0     | N | -     | 4.77E-18 |          |          |   |   |   |
|         |    |          |       | rs3792106  | 233855479 | intron            | 0     | N | 1.795 | 5.30E-15 |          |          |   |   |   |
|         |    |          |       | rs6737398  | 233835136 | intron            | 0     | N | 0.9   | 5.01E-09 |          |          |   |   |   |
|         |    |          |       | rs4663396  | 233856990 | intron            | 0     | N | 1.67  | 1.29E-08 |          |          |   |   |   |
|         |    |          |       | rs6431262  | 233864276 | intron            | 0     | N | 0.303 | 6.41E-06 |          |          |   |   |   |
|         |    |          |       | rs6861     | 233868852 | utr-3             | 0     | N | 0.274 | 1.08E-05 |          |          |   |   |   |

|          |    |          |       |            |           |             |       |   |       |          |          |          |   |   |   |  |
|----------|----|----------|-------|------------|-----------|-------------|-------|---|-------|----------|----------|----------|---|---|---|--|
|          |    |          |       | rs4663421  | 233866439 | intron      | 0     | N | 1.463 | 6.53E-04 |          |          |   |   |   |  |
|          |    |          |       | rs2289476  | 233846295 | intron      | 0     | N | -     | 1.43E-02 |          |          |   |   |   |  |
|          |    |          |       | rs7585217  | 233854145 | intron      | 0     | N | -     | 2.19E-02 |          |          |   |   |   |  |
|          |    |          |       | rs7600743  | 233854098 | intron      | 0.002 | N | 0.444 | 2.48E-02 |          |          |   |   |   |  |
|          |    |          |       | rs11890449 | 233864140 | intron      | 0     | N | -     | 4.96E-02 |          |          |   |   |   |  |
| LOC1001  |    |          |       |            |           |             |       |   |       |          |          |          |   |   |   |  |
| 30497    | 1  | 67511323 | 10727 | rs12119179 | 67520003  | -           | 0.002 | N | -     | 3.26E-15 | 1.11E-14 | 6.18E-15 | Y | Y | Y |  |
|          |    |          |       | rs11209032 | 67512680  | -           | 0     | N | -     | 4.42E-15 |          |          |   |   |   |  |
|          |    |          |       | rs11209033 | 67517088  | -           | 0.95  | N | -     | 7.61E-15 |          |          |   |   |   |  |
|          |    |          |       | rs12141431 | 67519611  | -           | 0.146 | N | -     | 1.95E-12 |          |          |   |   |   |  |
|          |    |          |       | rs6660226  | 67517189  | -           | 1     | N | 0.024 | 1.07E-11 |          |          |   |   |   |  |
| C1orf141 | 1  | 67325447 | 46361 | rs7515029  | 67368960  | -           | 0.979 | N | -     | 5.14E-15 | 1.03E-13 | 3.84E-14 | Y | Y | Y |  |
| -        | -  | -        | -     | rs10789223 | 67348990  | intron      | 0     | N | 2.724 | 9.67E-03 |          |          |   |   |   |  |
| -        | -  | -        | -     | rs3762318  | 67369707  | -           | 0     | N | 1.449 | 1.04E-02 |          |          |   |   |   |  |
| -        | -  | -        | -     | rs2144658  | 67344483  | intron      | 0     | N | -     | 1.16E-02 |          |          |   |   |   |  |
| -        | -  | -        | -     | rs7528804  | 67366407  | intron      | 0.429 | N | 0.967 | 3.46E-02 |          |          |   |   |   |  |
|          |    | 11724921 |       |            |           |             |       |   |       |          |          |          |   |   |   |  |
| PTGFRN   | 1  | 2        | 90283 | rs12078461 | 117273572 | intron      | 0     | N | -     | 1.06E-11 | 3.61E-10 | 1.61E-10 | Y | Y | Y |  |
| CYLD     | 16 | 49328462 | 69885 | rs3135503  | 49348751  | intron      | 0.035 | N | 0.103 | 5.82E-11 | 2.63E-10 | 2.75E-10 | Y | Y | Y |  |
|          |    |          |       | rs8060598  | 49339303  | intron      | 0     | N | -     | 5.85E-11 |          |          |   |   |   |  |
|          |    |          |       | rs4785450  | 49349769  | intron      | 0     | N | -     | 2.41E-10 |          |          |   |   |   |  |
|          |    |          |       | rs7342715  | 49344984  | intron      | 0.004 | N | 0.409 | 5.27E-09 |          |          |   |   |   |  |
|          |    |          |       | rs6500331  | 49366227  | intron      | 0     | N | 0.228 | 8.91E-09 |          |          |   |   |   |  |
|          |    |          |       | rs3785142  | 49344648  | intron      | 0.001 | N | 0.655 | 5.91E-08 |          |          |   |   |   |  |
| IRGM     | 5  | 15020287 | 10545 | rs13361189 | 150203580 | -           | 0     | N | -     | 1.59E-09 | 3.10E-09 | 2.90E-09 | Y | Y | Y |  |
|          |    |          |       | rs11957134 | 150211143 | -           | 0     | N | -     | 2.07E-09 |          |          |   |   |   |  |
|          |    |          |       | rs11949556 | 150209994 | -           | 0.002 | N | -     | 1.47E-07 |          |          |   |   |   |  |
|          |    | 21652025 |       |            |           |             |       |   |       |          |          |          |   |   |   |  |
| RRP15    | 1  | 2        | 62696 | rs1933641  | 216535584 | intron      | 0.998 | N | -     | 1.61E-09 | 1.13E-08 | 8.68E-09 | Y | Y | Y |  |
| NKX2-3   | 10 | 10127768 | 13591 | rs11190140 | 101281583 | near-gene-5 | 0.003 | N | -     | 3.01E-09 | 9.23E-09 | 1.07E-08 | Y | Y | Y |  |
|          |    |          |       | rs10883365 | 101277754 | -           | 0.131 | N | -     | 3.06E-09 |          |          |   |   |   |  |
|          |    |          |       | rs10883371 | 101282445 | near-gene-5 | 0     | N | 1.524 | 3.18E-09 |          |          |   |   |   |  |
|          |    |          |       | rs1548962  | 101279725 | -           | 0     | N | -     | 3.75E-09 |          |          |   |   |   |  |

|              |    |           |        |            |           |        |       |   |       |          |          |          |   |   |   |
|--------------|----|-----------|--------|------------|-----------|--------|-------|---|-------|----------|----------|----------|---|---|---|
|              |    |           |        | rs1548964  | 101279643 | -      | 0.022 | N | 1.529 | 4.41E-09 |          |          |   |   |   |
|              |    |           |        | rs10883367 | 101277980 | -      | 0     | N | -     | 4.83E-09 |          |          |   |   |   |
|              |    |           |        | rs6584283  | 101280291 | -      | 0     | N | -     | 4.97E-09 |          |          |   |   |   |
|              |    |           |        | rs11190137 | 101277934 | -      | 0     | N | 0.819 | 1.91E-06 |          |          |   |   |   |
|              |    |           |        | rs888208   | 101285853 | utr-3  | 0     | N | -     | 2.07E-06 |          |          |   |   |   |
|              |    |           |        | rs11190139 | 101278089 | -      | 0.146 | N | -     | 2.09E-06 |          |          |   |   |   |
|              |    |           |        | rs7899176  | 101279113 | -      | 0.868 | N | 0.197 | 2.93E-02 |          |          |   |   |   |
| LDB2         | 4  | 16107262  | 407163 | rs157613   | 16387385  | intron | 0.035 | N | 0.858 | 2.45E-10 | 3.04E-08 | 1.60E-08 | Y | Y | Y |
|              |    |           |        | rs16893604 | 16144569  | intron | 0.229 | N | 0.594 | 7.26E-03 |          | -        |   |   |   |
|              |    |           |        | rs11730714 | 16192214  | intron | 0     | N | 0.382 | 4.32E-02 |          | -        |   |   |   |
| PTPN2        | 18 | 12770480  | 108854 | rs1893217  | 12799340  | intron | 0     | N | -     | 1.32E-09 | 3.16E-08 | 1.63E-08 | Y | Y | Y |
|              |    |           |        | rs7234029  | 12867060  | intron | 0     | N | 0.435 | 3.45E-08 |          |          |   |   |   |
|              |    |           |        | rs657555   | 12837136  | intron | 0     | N | -     | 3.63E-08 |          |          |   |   |   |
|              |    |           |        | rs16939895 | 12811903  | intron | 0.002 | N | -     | 5.24E-08 |          |          |   |   |   |
|              |    |           |        | rs478582   | 12825976  | intron | 0.001 | N | -     | 1.83E-05 |          |          |   |   |   |
|              |    |           |        | rs8087237  | 12824359  | intron | 0.04  | N | -     | 1.86E-05 |          |          |   |   |   |
|              |    |           |        | rs2542152  | 12772761  | -      | 0.001 | N | -     | 2.73E-04 |          |          |   |   |   |
|              |    |           |        | rs2847297  | 12787694  | intron | 0.002 | N | 0.281 | 5.18E-04 |          |          |   |   |   |
|              |    |           |        | rs2847286  | 12807815  | intron | 0     | N | -     | 1.26E-03 |          |          |   |   |   |
|              |    |           |        | rs2542160  | 12779246  | intron | 0.017 | N | -     | 1.45E-03 |          |          |   |   |   |
|              |    |           |        | rs973767   | 12810057  | intron | 0.007 | N | -     | 1.73E-02 |          |          |   |   |   |
|              |    |           |        | rs8085163  | 12799304  | intron | 0.001 | N | -     | 1.88E-02 |          |          |   |   |   |
|              |    |           |        | rs10502414 | 12792416  | intron | 0.003 | N | -     | 2.13E-02 |          |          |   |   |   |
|              |    |           |        | rs2847288  | 12802896  | intron | 0.001 | N | 1.456 | 2.27E-02 |          |          |   |   |   |
|              |    |           |        | rs17597893 | 12802061  | intron | 0.458 | N | -     | 2.51E-02 |          |          |   |   |   |
| LOC100128543 | 5  | 150301305 | 65437  | rs931058   | 150313891 | -      | 0     | N | -     | 5.48E-09 | 9.31E-08 | 3.26E-08 | Y | Y | Y |
|              |    |           |        | rs11950220 | 150338652 | -      | 0.794 | N | 0.24  | 2.40E-03 |          |          |   |   |   |
|              |    |           |        | rs10050426 | 150331183 | -      | 0     | N | 0.679 | 2.60E-03 |          |          |   |   |   |
|              |    |           |        | rs11739412 | 150345215 | -      | 0     | N | 0.394 | 2.66E-03 |          |          |   |   |   |
|              |    |           |        | rs7710643  | 150338039 | -      | 0     | N | 0.266 | 2.85E-03 |          |          |   |   |   |
|              |    |           |        | rs3886104  | 150331722 | -      | 0     | N | 0.051 | 2.94E-03 |          |          |   |   |   |

|        |    |          |        |            |           |          |       |   |       |          |          |          |   |   |   |
|--------|----|----------|--------|------------|-----------|----------|-------|---|-------|----------|----------|----------|---|---|---|
|        |    |          |        | rs6898463  | 150343141 | -        | 0.057 | N | 1.292 | 7.82E-03 |          |          |   |   |   |
|        |    |          |        | rs1038074  | 150339150 | -        | 0     | N | -     | 8.21E-03 |          |          |   |   |   |
|        |    |          |        | rs4368715  | 150331858 | -        | 0     | N | 1.651 | 9.18E-03 |          |          |   |   |   |
| RFTN1  | 3  | 16327356 | 207870 | rs9839841  | 16454562  | intron   | 0.001 | N | 0.616 | 8.45E-10 | 6.25E-08 | 3.54E-08 | Y | Y | Y |
|        |    | 12789903 |        |            |           |          |       |   |       |          |          |          |   |   |   |
| GLT1D1 | 12 | 4        | 141428 | rs11060028 | 127987018 | intron   | 0.097 | N | 1.045 | 1.82E-09 | 6.00E-08 | 3.78E-08 | Y | Y | Y |
|        |    |          |        | rs11060043 | 128014906 | intron   | 0     | N | -     | 2.23E-02 |          |          |   |   |   |
| ATQL4  | 10 | 64165848 | 10449  | rs224063   | 64173355  | -        | 0.967 | N | 1.429 | 3.32E-08 | 6.64E-08 | 4.11E-08 | Y | Y | Y |
| -      | -  | -        | -      | rs224058   | 64168871  | -        | 0     | N | 1.103 | 2.46E-06 |          |          |   |   |   |
|        |    | 23387620 |        |            |           |          |       |   |       |          |          |          |   |   |   |
| SAG    | 2  | 7        | 49233  | rs1000141  | 233907086 | intron   | 0     | N | -     | 1.22E-08 | 2.31E-07 | 1.03E-07 | Y | Y | Y |
|        |    |          |        | rs2241874  | 233912366 | intron   | 0     | N | 0.342 | 2.13E-06 |          |          |   |   |   |
|        |    |          |        | rs2241873  | 233912663 | intron   | 0     | N | 0.342 | 2.79E-06 |          |          |   |   |   |
|        |    |          |        | rs3792091  | 233916061 | intron   | 0     | N | 1.07  | 4.97E-06 |          |          |   |   |   |
|        |    |          |        | rs3792096  | 233903639 | intron   | 0     | N | 0.038 | 4.15E-05 |          |          |   |   |   |
|        |    |          |        | rs745498   | 233902993 | intron   | 0     | N | 0.038 | 4.92E-05 |          |          |   |   |   |
|        |    |          |        | rs7608122  | 233897974 | intron   | 0     | N | 0.811 | 5.03E-05 |          |          |   |   |   |
|        |    |          |        | rs6710735  | 233899584 | intron   | 0.001 | N | -     | 5.41E-05 |          |          |   |   |   |
|        |    |          |        | rs894100   | 233902504 | intron   | 0     | N | 0.038 | 5.67E-05 |          |          |   |   |   |
|        |    |          |        | rs3792097  | 233903523 | intron   | 0     | N | 0.038 | 5.83E-05 |          |          |   |   |   |
|        |    |          |        | rs11679046 | 233922840 | -        | 0     | N | 1.647 | 2.56E-03 |          |          |   |   |   |
|        |    |          |        | rs13014016 | 233922193 | -        | 0.001 | N | 1.647 | 2.57E-03 |          |          |   |   |   |
|        |    |          |        | rs1000548  | 233900041 | intron   | 0     | N | -     | 5.00E-03 |          |          |   |   |   |
|        |    |          |        | rs1046974  | 233920286 | missense | 0     | N | -     | 6.74E-03 |          |          |   |   |   |
| GARNL1 | 14 | 35072309 | 280874 | rs10483456 | 35105918  | intron   | 0     | N | -     | 1.69E-08 | 4.39E-07 | 1.26E-07 | Y | Y | Y |
| -      | -  | -        | -      | rs1169032  | 35319325  | intron   | 0     | N | 1.995 | 4.21E-03 |          |          |   |   |   |
| -      | -  | -        | -      | rs1169030  | 35323827  | intron   | 0.017 | N | 0.466 | 1.15E-02 |          |          |   |   |   |
| MIER1  | 1  | 67158230 | 73660  | rs6656890  | 67231051  | -        | 0.044 | N | -     | 4.25E-08 | 5.52E-07 | 2.98E-07 | Y | Y | Y |
|        |    |          |        | rs12137403 | 67209631  | intron   | 0     | N | 2.372 | 4.80E-03 |          |          |   |   |   |
|        |    |          |        | rs4655663  | 67202691  | intron   | 0     | N | -     | 4.97E-03 |          |          |   |   |   |
|        |    |          |        | rs2985824  | 67182759  | intron   | 0     | N | -     | 5.17E-03 |          |          |   |   |   |
|        |    |          |        | rs3008871  | 67191677  | intron   | 0     | N | 2.323 | 6.10E-03 |          |          |   |   |   |
|        |    |          |        | rs4655662  | 67189020  | intron   | 0.007 | N | -     | 7.60E-03 |          |          |   |   |   |



|         |    |          |       |            |           |                   |       |   |       |          |          |          |   |   |   |
|---------|----|----------|-------|------------|-----------|-------------------|-------|---|-------|----------|----------|----------|---|---|---|
|         |    |          |       | rs12041926 | 67207190  | intron            | 0.014 | N | 2.375 | 9.07E-03 |          |          |   |   |   |
| TCTA    | 3  | 49419643 | 14270 | rs6784820  | 49425868  | intron            | 0     | N | -     | 4.61E-07 | 4.61E-07 | 4.61E-07 | N | Y | Y |
| LOC4411 |    | 13176957 |       |            |           |                   |       |   |       |          |          |          |   |   |   |
| 08      | 5  | 2        | 61386 | rs2188962  | 131798704 | intron            | 0     | N | -     | 5.20E-08 | 1.09E-06 | 5.15E-07 | Y | Y | Y |
|         |    |          |       | rs2522057  | 131829846 | -                 | 0     | N | -     | 2.39E-07 |          |          |   |   |   |
|         |    |          |       | rs1023518  | 131821671 | intron            | 0     | N | -     | 3.62E-06 |          |          |   |   |   |
|         |    |          |       | rs10077785 | 131829057 | -                 | 0.003 | N | 0.851 | 1.44E-05 |          |          |   |   |   |
|         |    |          |       | rs4235801  | 131810343 | intron            | 0.001 | N | -     | 6.27E-05 |          |          |   |   |   |
|         |    |          |       | rs4540166  | 131807756 | intron            | 0     | N | 1.01  | 7.10E-05 |          |          |   |   |   |
|         |    |          |       | rs11744116 | 131807659 | intron            | 0.004 | N | 1.01  | 7.47E-05 |          |          |   |   |   |
|         |    |          |       | rs4371745  | 131807854 | intron            | 0     | N | 1.01  | 1.01E-04 |          |          |   |   |   |
|         |    |          |       | rs6596075  | 131770127 | -                 | 0.007 | N | -     | 2.43E-04 |          |          |   |   |   |
|         |    |          |       | rs2285673  | 131783868 | intron            | 0     | N | 1.279 | 2.54E-04 |          |          |   |   |   |
|         |    |          |       | rs10071051 | 131780519 | intron            | 0.005 | N | 1.321 | 5.51E-04 |          |          |   |   |   |
|         |    |          |       | rs11242111 | 131783957 | intron            | 0     | N | -     | 1.18E-02 |          |          |   |   |   |
|         |    |          |       | rs725580   | 131792002 | intron            | 0.002 | N | 0.456 | 1.78E-02 |          |          |   |   |   |
| SBNO2   | 19 | 1053633  | 76649 | rs4807569  | 1074378   | intron            | 0     | N | -     | 1.16E-07 | 5.12E-07 | 6.48E-07 | Y | Y | Y |
|         |    |          |       | rs2024092  | 1075031   | intron            | 0.043 | N | -     | 1.28E-07 |          |          |   |   |   |
|         |    |          |       | rs2074916  | 1078720   | coding-synonymous | 0.998 | N | 0.064 | 1.68E-06 |          |          |   |   |   |
|         |    |          |       | rs2074452  | 1058160   | near-gene-3       | 0     | N | 0.375 | 4.42E-03 |          |          |   |   |   |
|         |    |          |       | rs2074920  | 1070019   | coding-synonymous | 0.961 | N | 1.32  | 3.40E-02 |          |          |   |   |   |
|         |    |          |       | rs2302109  | 1061829   | coding-synonymous | 0.992 | N | 1.681 | 3.56E-02 |          |          |   |   |   |
| APEH    | 3  | 49681439 | 19499 | rs4855881  | 49690450  | intron            | 0     | N | -     | 3.99E-07 | 7.99E-07 | 7.05E-07 | N | Y | Y |
| AMT     | 3  | 49424215 | 15801 | rs1464567  | 49434256  | intron            | 0.141 | N | -     | 5.24E-07 | 2.10E-06 | 9.54E-07 | N | Y | Y |
|         |    |          |       | rs9814873  | 49429116  | near-gene-3       | 0     | N | 0.095 | 1.55E-05 |          |          |   |   |   |
|         |    |          |       | rs6997     | 49428838  | near-gene-3       | 0.001 | N | 0.095 | 1.63E-05 |          |          |   |   |   |
|         |    |          |       | rs11715915 | 49430334  | coding-synonymous | 0.959 | N | 0.188 | 6.26E-05 |          |          |   |   |   |
| DAG1    | 3  | 49477569 | 75483 | rs3924462  | 49499240  | intron            | 0.022 | N | -     | 4.01E-07 | 1.25E-06 | 1.12E-06 | N | Y | Y |
|         |    |          |       | rs3870338  | 49532055  | intron            | 0.741 | N | -     | 5.32E-07 |          |          |   |   |   |
|         |    |          |       | rs11130199 | 49513803  | intron            | 0     | N | -     | 5.75E-07 |          |          |   |   |   |
|         |    |          |       | rs1050088  | 49545886  | utr-3             | 1     | N | -     | 7.15E-07 |          |          |   |   |   |

|         |   |               |        |            |           |                       |       |   |       |          |          |          |   |   |   |
|---------|---|---------------|--------|------------|-----------|-----------------------|-------|---|-------|----------|----------|----------|---|---|---|
|         |   |               |        | rs1801143  | 49545204  | coding-synon<br>ymous | 1     | N | -     | 1.62E-05 |          |          |   |   |   |
|         |   |               |        | rs4625     | 49547144  | utr-3                 | 1     | N | -     | 1.93E-05 |          |          |   |   |   |
| BTNL2   | 6 | 32465491      | 22387  | rs3763313  | 32484449  | -                     | 0     | N | 0.184 | 1.41E-07 | 2.68E-06 | 1.29E-06 | Y | Y | Y |
| -       | - | -             | -      | rs3117098  | 32466491  | -                     | 0     | N | -     | 8.95E-05 |          | -        |   |   |   |
| -       | - | -             | -      | rs4248166  | 32474399  | intron                | 0.023 | N | -     | 1.37E-02 |          | -        |   |   |   |
| -       | - | -             | -      | rs10947261 | 32481210  | intron                | 0.002 | N | 1.795 | 1.48E-02 |          | -        |   |   |   |
| MST1    | 3 | 49691391      | 14708  | rs3197999  | 49696536  | missense              | 0.003 | Y | -     | 1.47E-06 | 1.47E-06 | 1.47E-06 | N | Y | Y |
| BSN     | 3 | 49561926      | 127060 | rs11919311 | 49631793  | intron                | 0.053 | N | -     | 7.05E-07 | 6.11E-06 | 2.48E-06 | N | N | Y |
|         |   |               |        | rs2329020  | 49660077  | intron                | 0.008 | N | -     | 9.61E-07 |          |          |   |   |   |
|         |   |               |        | rs9858542  | 49676987  | coding-synon<br>ymous | 1     | N | -     | 1.31E-06 |          |          |   |   |   |
|         |   |               |        | rs11718165 | 49671801  | intron                | 0.131 | N | -     | 2.85E-06 |          |          |   |   |   |
|         |   |               |        | rs2131104  | 49671637  | intron                | 0     | N | -     | 2.96E-06 |          |          |   |   |   |
|         |   |               |        | rs9827708  | 49624993  | intron                | 0     | N | 0.041 | 3.20E-06 |          |          |   |   |   |
| ITLN1   | 1 | 15910795<br>4 | 18630  | rs2274910  | 159118670 | intron                | 0.008 | N | 0.385 | 2.23E-06 | 4.47E-06 | 2.70E-06 | N | N | Y |
|         |   |               |        | rs11265510 | 159126183 | -                     | 0.003 | N | 0.428 | 7.77E-06 |          |          |   |   |   |
| IHPK1   | 3 | 49731732      | 72245  | rs3749237  | 49745036  | intron                | 0.005 | N | -     | 2.85E-06 | 2.85E-06 | 2.85E-06 | N | Y | Y |
| RNF123  | 3 | 49696994      | 41972  | rs2291542  | 49726589  | coding-synon<br>ymous | 1     | N | -     | 3.10E-06 | 3.95E-06 | 3.10E-06 | N | Y | Y |
|         |   |               |        | rs11130214 | 49710750  | intron                | 0.002 | N | -     | 3.95E-06 |          |          |   |   |   |
| TNFSF15 | 9 | 11658642<br>1 | 26808  | rs6478109  | 116608587 | near-gene-5           | 0.03  | N | -     | 1.73E-06 | 3.58E-06 | 3.28E-06 | N | Y | Y |
|         |   |               |        | rs4263839  | 116606261 | intron                | 0     | N | -     | 2.46E-06 |          |          |   |   |   |
|         |   |               |        | rs6478108  | 116598524 | intron                | 0.001 | N | -     | 2.68E-06 |          |          |   |   |   |
|         |   |               |        | rs1407308  | 116610044 | -                     | 0     | N | 0.129 | 2.74E-02 |          |          |   |   |   |

Table S4. Genes with significant replication SNP p-values in Barrett et al. (2008)

| Gene Symbol | Gene P Value | Chromosome | Gene Length | SNP      | Position | Gene Feature | Conservation Score | miRNA Binding Site | Original GWAS P Value | Replication P Value |
|-------------|--------------|------------|-------------|----------|----------|--------------|--------------------|--------------------|-----------------------|---------------------|
| IL23R       | 8.29E-30     | 1          | rs11465804  | 67475114 | intron   | 0.005        | N                  | -                  | 3.1E-29               | 4.59144E-31         |

|         |          |   |            |           |          |       |   |       |           |             |
|---------|----------|---|------------|-----------|----------|-------|---|-------|-----------|-------------|
| -       | -        | - | rs11209026 | 67478546  | missense | 0.983 | N | -     | 1.5E-36   | 1.65091E-29 |
| -       | -        | - | rs7517847  | 67454257  | intron   | 0     | N | 0.013 | -         | 3.3206E-24  |
| -       | -        | - | rs1343151  | 67491717  | intron   | 0     | N | 0.603 | -         | 7.96045E-22 |
| -       | -        | - | rs10889677 | 67497708  | utr-3    | 0.097 | N | -     | -         | 1.32968E-21 |
| -       | -        | - | rs11805303 | 67448104  | intron   | 0.02  | N | -     | 5.62E-17  | 3.43286E-21 |
| -       | -        | - | rs1004819  | 67442801  | intron   | 0.001 | N | -     | -         | 8.47587E-21 |
| -       | -        | - | rs10489629 | 67460937  | intron   | 0.001 | N | 0.723 | -         | 3.12483E-20 |
| -       | -        | - | rs2201841  | 67466790  | intron   | 0.219 | N | -     | -         | 3.15258E-20 |
| -       | -        | - | rs10489630 | 67435210  | intron   | 0.251 | N | 0.237 | -         | 1.12181E-15 |
| -       | -        | - | rs2064689  | 67425598  | intron   | 0.007 | N | -     | -         | 1.53864E-13 |
| -       | -        | - | rs17375018 | 67427735  | intron   | 0     | N | -     | -         | 1.87686E-13 |
| -       | -        | - | rs11209018 | 67439879  | intron   | 0     | N | -     | -         | 1.73849E-10 |
| -       | -        | - | rs6664119  | 67428483  | intron   | 0     | N | -     | -         | 7.22491E-07 |
| -       | -        | - | rs1884444  | 67406400  | missense | 0.388 | N | -     | -         | 3.14845E-06 |
| -       | -        | - | rs10489628 | 67476695  | intron   | 0     | N | 1.145 | -         | 3.88015E-05 |
| -       | -        | - | rs6682033  | 67481258  | intron   | 0     | N | -     | -         | 8.69994E-05 |
| -       | -        | - | rs12030948 | 67474353  | intron   | 0.047 | N | -     | -         | 0.000130163 |
| -       | -        | - | rs10127763 | 67424321  | intron   | 0.001 | N | 0.8   | -         | 0.013818462 |
| -       | -        | - | rs4655689  | 67432009  | intron   | 0.01  | N | 0.597 | -         | 0.014397741 |
| -       | -        | - | rs6687620  | 67421048  | intron   | 0     | N | -     | -         | 0.015326968 |
| ATG16L1 | 8.77E-18 | 2 | rs2241880  | 233848107 | missense | 0.593 | N | -     | 0.0000366 | 1.29252E-18 |
| -       | -        | - | rs6431654  | 233826508 | intron   | 0.009 | N | -     | -         | 2.52222E-18 |

|        |          |    |            |           |             |       |   |       |             |             |
|--------|----------|----|------------|-----------|-------------|-------|---|-------|-------------|-------------|
| -      | -        | -  | rs6752107  | 233826187 | intron      | 0     | N | -     | -           | 3.55392E-18 |
| -      | -        | -  | rs10210302 | 233823578 | near-gene-5 | 0     | N | 1.827 | -           | 3.81386E-18 |
| -      | -        | -  | rs3828309  | 233845149 | intron      | 0     | N | -     | 7.67E-14    | 4.6621E-18  |
| -      | -        | -  | rs3792106  | 233855479 | intron      | 0     | N | 1.795 | -           | 5.20126E-15 |
| -      | -        | -  | rs6737398  | 233835136 | intron      | 0     | N | 0.9   | -           | 4.95544E-09 |
| -      | -        | -  | rs4663396  | 233856990 | intron      | 0     | N | 1.67  | -           | 1.27726E-08 |
| -      | -        | -  | rs6431262  | 233864276 | intron      | 0     | N | 0.303 | -           | 6.37102E-06 |
| -      | -        | -  | rs6861     | 233868852 | utr-3       | 0     | N | 0.274 | -           | 1.0745E-05  |
| -      | -        | -  | rs4663421  | 233866439 | intron      | 0     | N | 1.463 | -           | 0.000650076 |
| -      | -        | -  | rs2289476  | 233846295 | intron      | 0     | N | -     | -           | 0.014277047 |
| -      | -        | -  | rs7585217  | 233854145 | intron      | 0     | N | -     | -           | 0.021885382 |
| -      | -        | -  | rs7600743  | 233854098 | intron      | 0.002 | N | 0.444 | -           | 0.024757969 |
| -      | -        | -  | rs11890449 | 233864140 | intron      | 0     | N | -     | -           | 0.049571341 |
| NKX2-3 | 1.07E-08 | 10 | rs11190140 | 101281583 | near-gene-5 | 0.003 | N | -     | 0.000000169 | 2.98041E-09 |
| -      | -        | -  | rs10883371 | 101282445 | near-gene-5 | 0     | N | 1.524 | 0.00000031  | 3.14977E-09 |
| -      | -        | -  | rs1548962  | 101279725 | -           | 0     | N | -     | -           | 3.71021E-09 |
| -      | -        | -  | rs6584283  | 101280291 | -           | 0     | N | -     | -           | 4.91737E-09 |
| -      | -        | -  | rs888208   | 101285853 | utr-3       | 0     | N | -     | -           | 2.05179E-06 |
| PTPN2  | 1.63E-08 | 18 | rs1893217  | 12799340  | intron      | 0     | N | -     | 0.00000123  | 1.3002E-09  |
| -      | -        | -  | rs7234029  | 12867060  | intron      | 0     | N | 0.435 | -           | 3.41274E-08 |
| -      | -        | -  | rs657555   | 12837136  | intron      | 0     | N | -     | -           | 3.59514E-08 |
| -      | -        | -  | rs16939895 | 12811903  | intron      | 0.002 | N | -     | -           | 5.19118E-08 |

|           |          |   |            |           |          |       |   |       |             |             |
|-----------|----------|---|------------|-----------|----------|-------|---|-------|-------------|-------------|
| -         | -        | - | rs478582   | 12825976  | intron   | 0.001 | N | -     | -           | 1.81869E-05 |
| -         | -        | - | rs8087237  | 12824359  | intron   | 0.04  | N | -     | -           | 1.84763E-05 |
| -         | -        | - | rs2542152  | 12772761  | -        | 0.001 | N | -     | -           | 0.000271523 |
| -         | -        | - | rs2847297  | 12787694  | intron   | 0.002 | N | 0.281 | -           | 0.000515974 |
| -         | -        | - | rs2847286  | 12807815  | intron   | 0     | N | -     | -           | 0.001250802 |
| -         | -        | - | rs2542160  | 12779246  | intron   | 0.017 | N | -     | -           | 0.001448865 |
| -         | -        | - | rs973767   | 12810057  | intron   | 0.007 | N | -     | -           | 0.017252731 |
| -         | -        | - | rs8085163  | 12799304  | intron   | 0.001 | N | -     | -           | 0.018807286 |
| -         | -        | - | rs10502414 | 12792416  | intron   | 0.003 | N | -     | -           | 0.021267397 |
| -         | -        | - | rs2847288  | 12802896  | intron   | 0.001 | N | 1.456 | -           | 0.022628828 |
| -         | -        | - | rs17597893 | 12802061  | intron   | 0.458 | N | -     | -           | 0.025079206 |
| LOC441108 | 5.15E-07 | 5 | rs2188962  | 131798704 | intron   | 0     | N | -     | 3.52E-11    | 5.15284E-08 |
| -         | -        | - | rs1023518  | 131821671 | intron   | 0     | N | -     | -           | 3.59645E-06 |
| -         | -        | - | rs4235801  | 131810343 | intron   | 0.001 | N | -     | -           | 6.23731E-05 |
| -         | -        | - | rs4540166  | 131807756 | intron   | 0     | N | 1.01  | -           | 7.06644E-05 |
| -         | -        | - | rs11744116 | 131807659 | intron   | 0.004 | N | 1.01  | -           | 7.42846E-05 |
| -         | -        | - | rs4371745  | 131807854 | intron   | 0     | N | 1.01  | -           | 0.000100737 |
| -         | -        | - | rs2285673  | 131783868 | intron   | 0     | N | 1.279 | -           | 0.000252617 |
| -         | -        | - | rs10071051 | 131780519 | intron   | 0.005 | N | 1.321 | -           | 0.000548751 |
| -         | -        | - | rs11242111 | 131783957 | intron   | 0     | N | -     | -           | 0.011792449 |
| -         | -        | - | rs725580   | 131792002 | intron   | 0.002 | N | 0.456 | -           | 0.017718287 |
| MST1      | 1.47E-06 | 3 | rs3197999  | 49696536  | missense | 0.003 | Y | -     | 0.000000564 | 1.46097E-06 |

|          |          |    |            |           |                   |       |   |       |             |             |
|----------|----------|----|------------|-----------|-------------------|-------|---|-------|-------------|-------------|
| TNFSF15  | 3.28E-06 | 9  | rs6478109  | 116608587 | near-gene-5       | 0.03  | N | -     | 0.00422     | 1.71866E-06 |
| -        | -        | -  | rs4263839  | 116606261 | intron            | 0     | N | -     | 0.0000658   | 2.44605E-06 |
| -        | -        | -  | rs6478108  | 116598524 | intron            | 0.001 | N | -     | -           | 2.6632E-06  |
| -        | -        | -  | rs1407308  | 116610044 | -                 | 0     | N | 0.129 | -           | 0.027321752 |
| C13orf31 | 4.30E-06 | 13 | rs3764147  | 43355925  | missense          | 1     | N | 0.508 | 0.000000133 | 1.12695E-06 |
| -        | -        | -  | rs895266   | 43359179  | intron            | 0     | N | 1.652 | -           | 0.000153922 |
| -        | -        | -  | rs6561150  | 43358470  | intron            | 0.049 | N | -     | -           | 0.001194344 |
| BSN      | 2.48E-06 | 3  | rs11919311 | 49631793  | intron            | 0.053 | N | -     | -           | 6.99563E-07 |
| -        | -        | -  | rs2329020  | 49660077  | intron            | 0.008 | N | -     | -           | 9.54069E-07 |
| -        | -        | -  | rs9858542  | 49676987  | coding-synonymous | 1     | N | -     | 0.00000224  | 1.29921E-06 |
| -        | -        | -  | rs11718165 | 49671801  | intron            | 0.131 | N | -     | -           | 2.82772E-06 |
| -        | -        | -  | rs2131104  | 49671637  | intron            | 0     | N | -     | -           | 2.94307E-06 |
| -        | -        | -  | rs9827708  | 49624993  | intron            | 0     | N | 0.041 | -           | 3.18091E-06 |
| RTEL1    | 6.45E-06 | 20 | rs6010620  | 61780283  | intron            | 0     | N | 0.57  | -           | 1.7197E-06  |
| -        | -        | -  | rs2297441  | 61798026  | utr-3             | 0.012 | Y | 0.548 | 0.000138    | 7.92104E-06 |
| FGFR1OP  | 1.12E-05 | 6  | rs7749278  | 167355315 | intron            | 0     | N | 1.426 | 0.00121     | 2.099E-06   |
| -        | -        | -  | rs2301436  | 167357978 | intron            | 0.086 | N | 1.382 | 0.000000326 | 2.09912E-06 |
| -        | -        | -  | rs12526548 | 167351137 | intron            | 0.005 | N | 1.36  | -           | 2.59748E-06 |
| -        | -        | -  | rs1894603  | 167354676 | intron            | 0     | N | 1.366 | -           | 3.12779E-06 |
| -        | -        | -  | rs9295385  | 167368171 | intron            | 0     | N | -     | -           | 2.5734E-05  |
| -        | -        | -  | rs9457252  | 167353915 | intron            | 0     | N | 1.739 | -           | 3.22963E-05 |
| -        | -        | -  | rs16899799 | 167357893 | intron            | 0     | N | -     | -           | 0.012418021 |

|         |          |    |            |           |                   |       |   |       |            |             |
|---------|----------|----|------------|-----------|-------------------|-------|---|-------|------------|-------------|
| -       | -        | -  | rs16899828 | 167371586 | intron            | 0.001 | N | -     | -          | 0.01547612  |
| -       | -        | -  | rs162295   | 167374087 | near-gene-3       | 0.152 | N | -     | -          | 0.016942114 |
| -       | -        | -  | rs16899801 | 167358388 | intron            | 0     | N | -     | -          | 0.01769981  |
| -       | -        | -  | rs16899825 | 167371516 | intron            | 0.001 | N | -     | -          | 0.018747718 |
| -       | -        | -  | rs16899821 | 167370997 | intron            | 0.298 | N | -     | -          | 0.018880907 |
| -       | -        | -  | rs162297   | 167375129 | -                 | 0.017 | N | -     | -          | 0.0201477   |
| -       | -        | -  | rs16899788 | 167351316 | intron            | 0     | N | -     | -          | 0.021625807 |
| -       | -        | -  | rs2282859  | 167365129 | intron            | 0     | N | -     | -          | 0.024647348 |
| -       | -        | -  | rs239932   | 167334671 | intron            | 0     | N | -     | -          | 0.030097109 |
| MUC19   | 2.05E-05 | 12 | rs11564144 | 39104262  | intron            | 0     | N | -     | 0.0000655  | 1.23764E-06 |
| -       | -        | -  | rs11564247 | 39107745  | intron            | 0     | N | -     | -          | 1.97366E-06 |
| -       | -        | -  | rs11564249 | 39106670  | coding-synonymous | 0.273 | N | -     | -          | 5.84306E-06 |
| -       | -        | -  | rs7972535  | 39104527  | intron            | 0     | N | -     | -          | 0.018468879 |
| C1orf81 | 1.24E-04 | 1  | rs11584383 | 199202489 | -                 | 0     | N | -     | 0.00000234 | 3.95107E-06 |
| -       | -        | -  | rs404339   | 199153514 | -                 | 0     | N | -     | -          | 1.87772E-05 |
| -       | -        | -  | rs11579874 | 199186985 | -                 | 0     | N | -     | -          | 2.458E-05   |
| -       | -        | -  | rs296547   | 199158760 | -                 | 0     | N | 1.358 | -          | 0.000147579 |
| -       | -        | -  | rs378672   | 199152956 | -                 | 0     | N | 1.217 | -          | 0.000370954 |
| -       | -        | -  | rs1572789  | 199198928 | -                 | 0.002 | N | 0.11  | -          | 0.000400393 |
| -       | -        | -  | rs2050786  | 199181190 | -                 | 0.003 | N | -     | -          | 0.01703945  |
| -       | -        | -  | rs4915471  | 199201055 | -                 | 0.001 | N | -     | -          | 0.024396118 |
| KIF21B  | 4.80E-05 | 1  | rs2297909  | 199226930 | intron            | 0     | N | -     | 0.0001     | 9.77536E-06 |

|        |          |   |            |           |             |       |   |       |          |             |
|--------|----------|---|------------|-----------|-------------|-------|---|-------|----------|-------------|
| -      | -        | - | rs12122721 | 199251103 | intron      | 0     | N | 1.447 | -        | 1.51102E-05 |
| -      | -        | - | rs6687260  | 199247321 | intron      | 0     | N | 0.444 | -        | 0.000513631 |
| -      | -        | - | rs957957   | 199254421 | intron      | 0     | N | 0.409 | -        | 0.000555905 |
| -      | -        | - | rs6700264  | 199250645 | intron      | 0     | N | 0.37  | -        | 0.000574251 |
| -      | -        | - | rs10800750 | 199231201 | intron      | 0     | N | 0.08  | -        | 0.001588753 |
| CDKAL1 | 1.69E-04 | 6 | rs6908425  | 20836710  | intron      | 0.024 | N | 0.895 | 0.000278 | 1.66954E-06 |
| -      | -        | - | rs7748720  | 20797924  | intron      | 0.039 | N | 0.686 | 0.0288   | 2.30282E-06 |
| -      | -        | - | rs4712527  | 20771314  | intron      | 0     | N | 0.234 | -        | 7.15114E-06 |
| -      | -        | - | rs7758851  | 20650200  | intron      | 0     | N | -     | -        | 0.000484474 |
| -      | -        | - | rs17584626 | 20668414  | intron      | 0.25  | N | -     | -        | 0.000820799 |
| -      | -        | - | rs6928012  | 20836492  | intron      | 0.011 | N | 2.085 | -        | 0.000864618 |
| -      | -        | - | rs7763304  | 20732013  | intron      | 0.004 | N | -     | -        | 0.000909073 |
| -      | -        | - | rs714831   | 20732337  | intron      | 0     | N | 2.487 | -        | 0.001500132 |
| -      | -        | - | rs6909467  | 20641141  | near-gene-5 | 0     | N | 0.413 | -        | 0.002649483 |
| -      | -        | - | rs9465895  | 20912542  | intron      | 0.001 | N | -     | -        | 0.006348348 |
| -      | -        | - | rs9368246  | 20974836  | intron      | 0     | N | -     | -        | 0.006374474 |
| -      | -        | - | rs12661606 | 20923239  | intron      | 0.001 | N | 1.551 | -        | 0.007199632 |
| -      | -        | - | rs9460563  | 20932997  | intron      | 0     | N | -     | -        | 0.007490285 |
| -      | -        | - | rs9465904  | 20929641  | intron      | 0     | N | 1.555 | -        | 0.007564846 |
| -      | -        | - | rs2328531  | 20751731  | intron      | 0.026 | N | 1.347 | -        | 0.007604194 |
| -      | -        | - | rs9358383  | 21107366  | intron      | 0.019 | N | 0.904 | -        | 0.008196909 |
| -      | -        | - | rs9465890  | 20882738  | intron      | 0     | N | -     | -        | 0.008610364 |



|   |   |   |            |          |                   |       |   |       |   |             |
|---|---|---|------------|----------|-------------------|-------|---|-------|---|-------------|
| - | - | - | rs4712556  | 20964682 | intron            | 0.001 | N | -     | - | 0.009095232 |
| - | - | - | rs9465831  | 20719905 | intron            | 0     | N | -     | - | 0.009224427 |
| - | - | - | rs9358376  | 21006228 | intron            | 0     | N | -     | - | 0.01224754  |
| - | - | - | rs7758612  | 20747583 | intron            | 0     | N | 1.14  | - | 0.013217298 |
| - | - | - | rs9358363  | 20851931 | intron            | 0     | N | -     | - | 0.013471554 |
| - | - | - | rs9358401  | 21325164 | intron            | 0     | N | -     | - | 0.016048297 |
| - | - | - | rs4645410  | 20981827 | intron            | 0     | N | -     | - | 0.016162875 |
| - | - | - | rs7747989  | 20921354 | intron            | 0     | N | -     | - | 0.016467776 |
| - | - | - | rs9465923  | 20990154 | intron            | 0     | N | -     | - | 0.017004143 |
| - | - | - | rs4712572  | 21069040 | intron            | 0     | N | -     | - | 0.017652114 |
| - | - | - | rs9358372  | 20920567 | intron            | 0.005 | N | 1.071 | - | 0.019240928 |
| - | - | - | rs6918457  | 20674435 | intron            | 0     | N | -     | - | 0.020258012 |
| - | - | - | rs4077404  | 20984592 | intron            | 0.066 | N | -     | - | 0.020866436 |
| - | - | - | rs9465994  | 21309472 | coding-synonymous | 0.974 | N | -     | - | 0.021207803 |
| - | - | - | rs1012625  | 20685748 | intron            | 0     | N | -     | - | 0.02126024  |
| - | - | - | rs4710944  | 20852706 | intron            | 0.001 | N | -     | - | 0.022076589 |
| - | - | - | rs6905567  | 20915109 | intron            | 0.66  | N | -     | - | 0.024868061 |
| - | - | - | rs12211211 | 20905830 | intron            | 0.069 | N | -     | - | 0.026088234 |
| - | - | - | rs2446484  | 21248465 | intron            | 0     | N | -     | - | 0.026760222 |
| - | - | - | rs1498426  | 21116132 | intron            | 0.004 | N | 0.614 | - | 0.029898827 |
| - | - | - | rs6938184  | 21026230 | intron            | 0     | N | -     | - | 0.03081053  |
| - | - | - | rs201311   | 21124511 | intron            | 0     | N | -     | - | 0.031369719 |

|        |          |    |            |           |             |       |   |       |           |             |
|--------|----------|----|------------|-----------|-------------|-------|---|-------|-----------|-------------|
| -      | -        | -  | rs4710958  | 21018982  | intron      | 0     | N | -     | -         | 0.032535147 |
| -      | -        | -  | rs4236002  | 20962984  | intron      | 0.067 | N | 0.63  | -         | 0.033841647 |
| -      | -        | -  | rs7764365  | 21225585  | intron      | 0     | N | 1.467 | -         | 0.035945069 |
| -      | -        | -  | rs4710964  | 21216170  | intron      | 0     | N | -     | -         | 0.036131297 |
| -      | -        | -  | rs6942273  | 21333556  | intron      | 0     | N | -     | -         | 0.036290924 |
| -      | -        | -  | rs6456382  | 21009290  | intron      | 0     | N | 0.544 | -         | 0.043597423 |
| STAT3  | 1.87E-04 | 17 | rs744166   | 37767727  | intron      | 0     | N | -     | 9.15E-08  | 2.58652E-05 |
| -      | -        | -  | rs9891119  | 37761506  | intron      | 0.053 | N | -     | -         | 0.00011722  |
| -      | -        | -  | rs1026916  | 37783361  | intron      | 0     | N | -     | -         | 0.000122385 |
| -      | -        | -  | rs7211777  | 37787601  | intron      | 0.133 | N | -     | -         | 0.000129959 |
| -      | -        | -  | rs3816769  | 37751799  | intron      | 0     | N | -     | -         | 0.000227181 |
| -      | -        | -  | rs3785898  | 37768646  | intron      | 0     | N | 1.361 | -         | 0.00080672  |
| -      | -        | -  | rs8069645  | 37748428  | intron      | 0.004 | N | -     | -         | 0.001261271 |
| -      | -        | -  | rs4796793  | 37795736  | -           | 0.002 | N | 1.216 | -         | 0.003227348 |
| RSBN1  | 3.46E-04 | 1  | rs6679677  | 114105331 | near-gene-3 | 0     | N | -     | 0.0000825 | 5.94813E-05 |
| -      | -        | -  | rs12117799 | 114120127 | intron      | 0.001 | N | -     | -         | 0.014913014 |
| -      | -        | -  | rs2040041  | 114114146 | intron      | 0.003 | N | -     | -         | 0.037509224 |
| -      | -        | -  | rs2797409  | 114131725 | intron      | 0.016 | N | 0.1   | -         | 0.045986791 |
| -      | -        | -  | rs1217396  | 114139759 | intron      | 0     | N | 0.057 | -         | 0.046760912 |
| PTPN22 | 4.10E-04 | 1  | rs2476601  | 114179091 | missense    | 0.999 | N | -     | 0.000101  | 6.80765E-05 |
| -      | -        | -  | rs2476602  | 114198478 | intron      | 0.001 | N | -     | -         | 0.011895252 |
| -      | -        | -  | rs2488457  | 114216891 | -           | 0.001 | N | -     | -         | 0.017065164 |

|      |          |    |            |           |             |       |   |       |          |             |
|------|----------|----|------------|-----------|-------------|-------|---|-------|----------|-------------|
| -    | -        | -  | rs2476599  | 114164982 | intron      | 0     | N | -     | -        | 0.018711804 |
| -    | -        | -  | rs1217414  | 114214190 | intron      | 0.001 | N | -     | -        | 0.02694673  |
| -    | -        | -  | rs1217407  | 114195271 | intron      | 0     | N | 0.792 | -        | 0.036840222 |
| CCNY | 4.79E-04 | 10 | rs3936503  | 35589263  | intron      | 0     | N | 2.128 | 0.000176 | 4.79365E-05 |
| -    | -        | -  | rs16935948 | 35589754  | intron      | 0.002 | N | 2.128 | -        | 4.93806E-05 |
| -    | -        | -  | rs17500653 | 35575603  | near-gene-5 | 0     | N | 0.152 | -        | 0.000599893 |
| -    | -        | -  | rs7921820  | 35594953  | intron      | 0.863 | N | 1.566 | -        | 0.001975593 |
| -    | -        | -  | rs10827512 | 35855733  | intron      | 0     | N | 0.193 | -        | 0.030766495 |
